# Supplementary material for: Fanconi anemia is associated with a defect in the BRCA2 partner PALB2
Source: Springer Nature journal article supplement (doi:10.1038/ng1942), 2006-12-31
Supplement: ng1942-S2.pdf [file ng1942-S2.pdf]

**Xia and Dorsman et. al. Supplementary Figure 2**

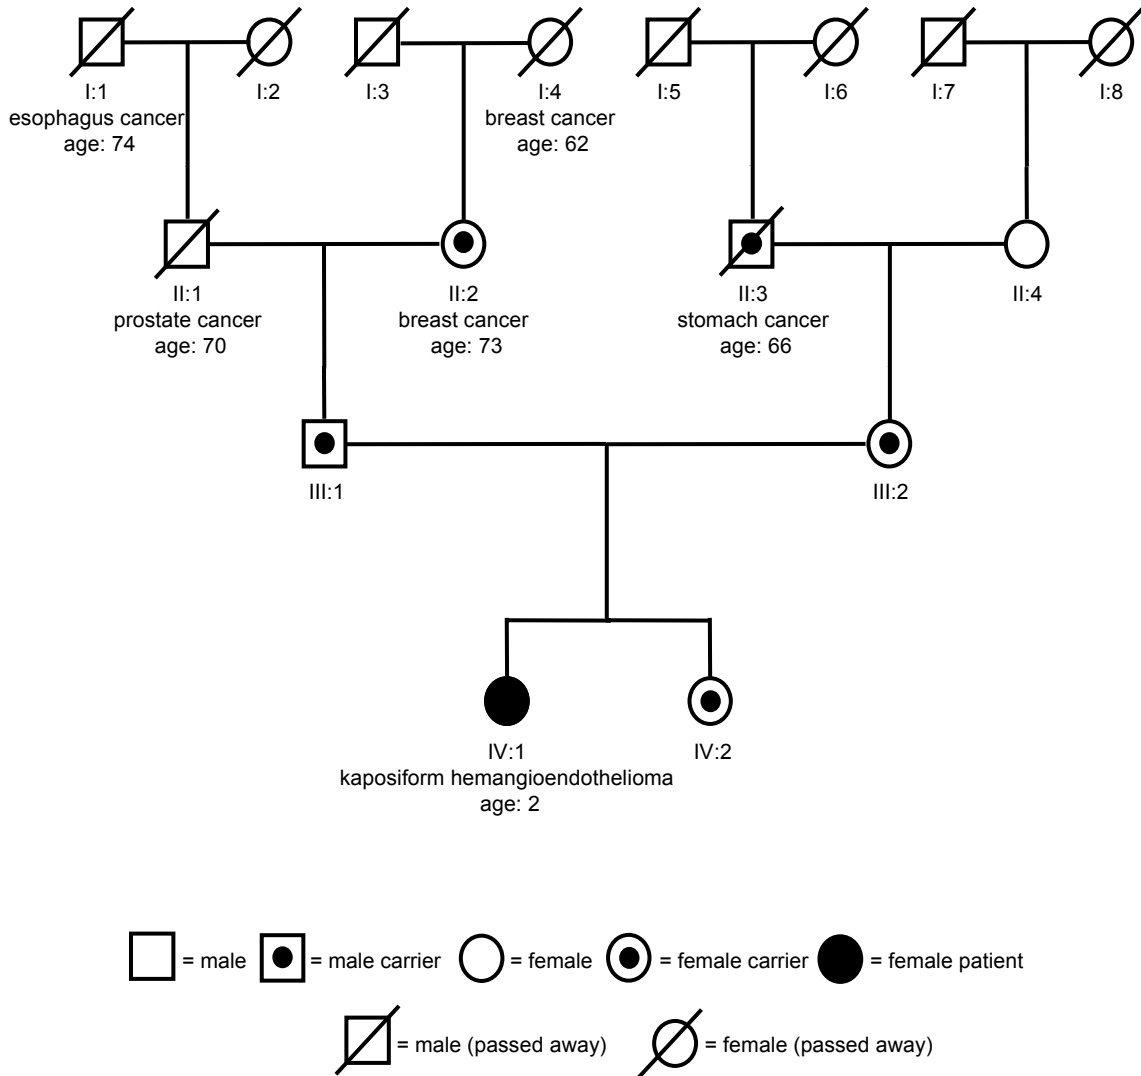

**Supplementary Figure 2. Pedigree of patient EUFA1341 and cancer cases in the family (including age at diagnosis)** Individuals II:3 and III:2 are carriers for the non-sense mutation Y551X, individuals II:2, III:1 and IV:2 are carriers for the large genomic deletion. Material from individuals I:1, I:2, I:3, I:4, I:5, I:6, I:7, I:8 and II:1 was not available
